# Supplementary material
Source: PubMed Central journal article supplement (PMC5903431)
Supplement: NIHMS953046-supplement-Supplemental_Appendix.pdf [file NIHMS953046-supplement-Supplemental_Appendix.pdf]

## Online Supplemental Appendix

**Supplemental Table 1:** Logistic regression analysis of Model 3.

|                     | <b>OR (95% CI)</b> | <b>p-Value</b> | <b>AUC</b> |
|---------------------|--------------------|----------------|------------|
| Age <60             | 0.54 (0.44, 0.67)  | <0.001         | 0.63       |
| Medical History     | 0.67 (0.50, 0.91)  | 0.009          |            |
| Tobacco Use         | 0.91 (0.81, 1.01)  | 0.07           |            |
| Weight (per 10 lbs) | 1.00 (1.00, 1.00)  | 0.002          |            |
| Prior VTE           | 1.21 (0.97, 1.50)  | 0.09           |            |
| Alcohol use         | 0.49 (0.31, 0.77)  | 0.002          |            |

VTE, venous thromboembolism; OR, Odds Ratio; CI, Confidence Interval; AUC, Area Under the Receiver Operator Curve.

**Supplemental Table 2:** Relationship between SAME-TT<sub>2</sub>R<sub>2</sub> scores and adverse clinical outcomes.

| <b>SAME-TT<sub>2</sub>R<sub>2</sub></b> | <b>N</b> | <b>Recurrent VTE (%)</b> | <b>ISTH Major Bleeding (%)</b> | <b>Overall Adverse Events (%)</b> | <b>Total follow-up years</b> |
|-----------------------------------------|----------|--------------------------|--------------------------------|-----------------------------------|------------------------------|
| 0                                       | 155      | 1 (0.6)                  | 7 (4.5)                        | 8 (5.2)                           | 197.4                        |
| 1                                       | 510      | 6 (1.2)                  | 16 (3.1)                       | 22 (4.3)                          | 592.4                        |
| 2                                       | 432      | 12 (2.8)                 | 15 (3.5)                       | 27 (6.3)                          | 463.3                        |
| 3                                       | 431      | 17 (3.9)                 | 22 (5.1)                       | 39 (9.0)                          | 462.4                        |
| 4                                       | 289      | 16 (5.5)                 | 6 (2.1)                        | 22 (7.6)                          | 275.0                        |
| >5                                      | 126      | 4 (3.2)                  | 4 (3.2)                        | 8 (6.3)                           | 136.8                        |

VTE, venous thromboembolism; ISTH, International Society of Thrombosis and Haemostasis
